# Supplementary material for: Expert Perspectives on the Effectiveness of Psychotherapy
Source: MDPI journal article supplement (doi:10.3390/ijerph20186739), 2023-09-11
Supplement: s1 [file s1]

Supplementary material:

Questions to the experts:

- Do experts from different relevant areas of the macro-level evaluate the differentiation of psychotherapy care, training and its effectiveness?
- Which principles and criteria do the experts use to evaluate the options and limitations of psychotherapy and psychotherapy training in the care system? To what extent are training-, profession- or organisation-specific structurings manifested in these evaluations?
- Do they evaluate the range of psychotherapy services and their publics, as well as their societal role?
- Do the experts explicitly problematize (missing) developments of rules and resources (structures) of psychotherapeutic care?
- Do they evaluate their consequences? How?
- Which (further) development possibilities and problem-solving patterns of psychotherapeutic care are named by the experts concerned and how do they evaluate them?
- Are the problem-solving patterns linked to possible interests?
